# Supplementary material for: Benchmarking a highly selective USP30 inhibitor for enhancement of mitophagy and pexophagy
Source: PubMed Central journal article supplement (PMC8645336; doi:10.26508/lsa.202101287), 2021-11-29

Source Data: Figure 1C

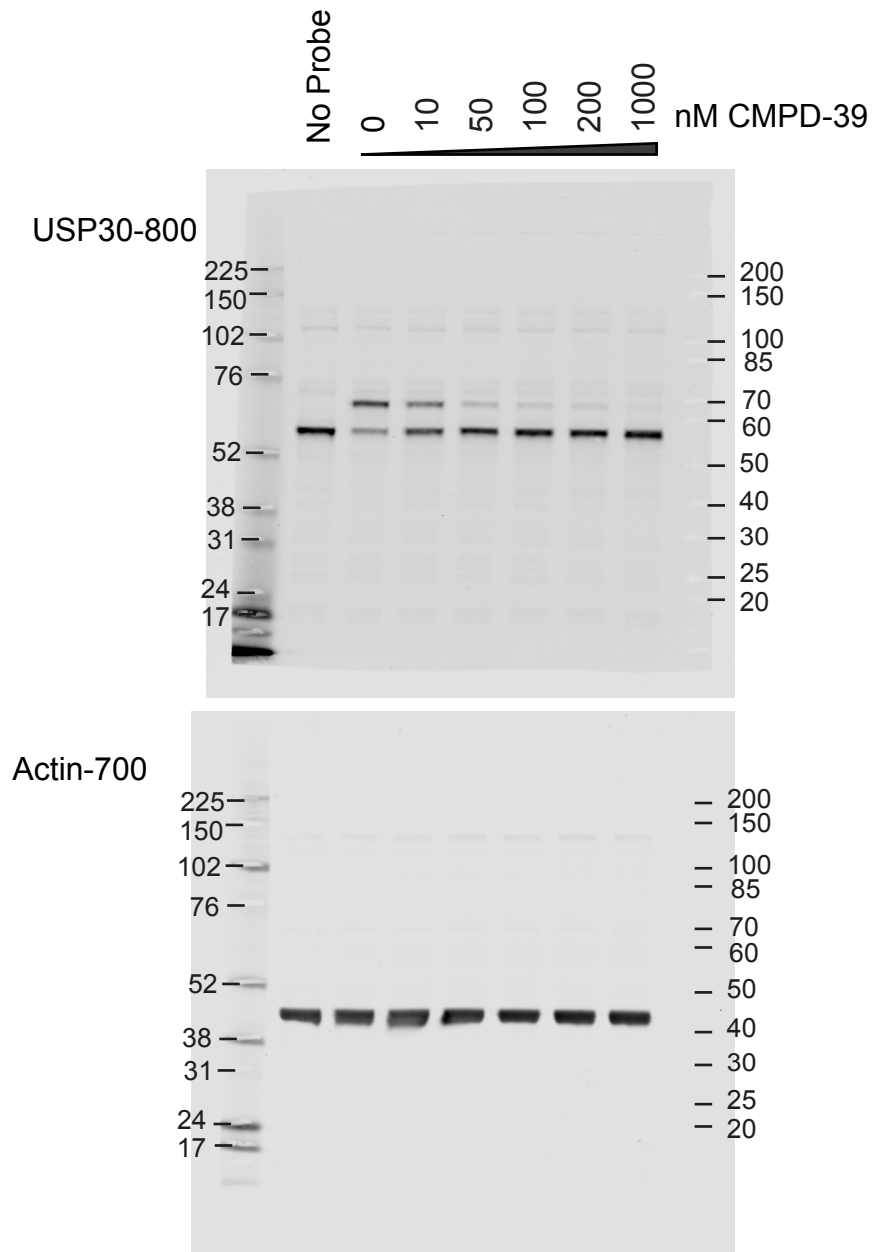

Source Data: Figure 1D

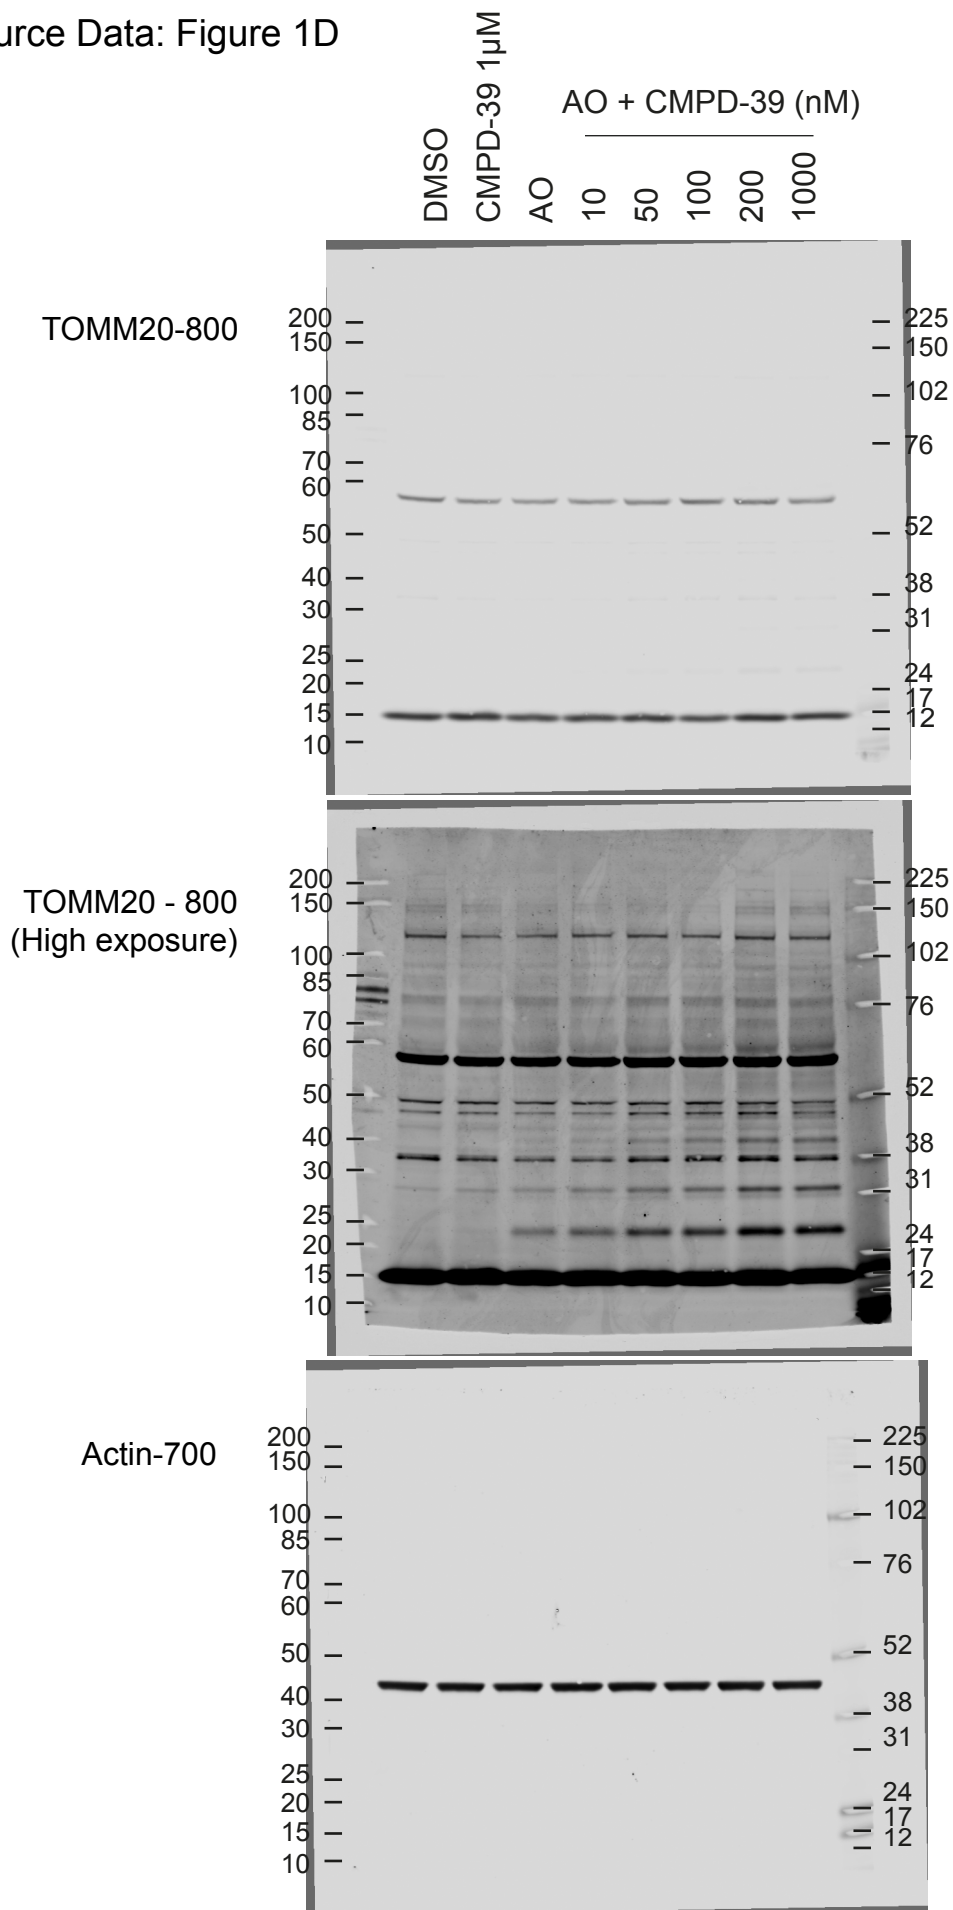

Supplement: LSA-2021-01287_SdataF2.2.pdf [file LSA-2021-01287_SdataF2.2.pdf]
