# Supplementary material for: Benchmarking a highly selective USP30 inhibitor for enhancement of mitophagy and pexophagy
Source: PubMed Central journal article supplement (PMC8645336; doi:10.26508/lsa.202101287), 2021-11-29

Source Data: Figure 2A

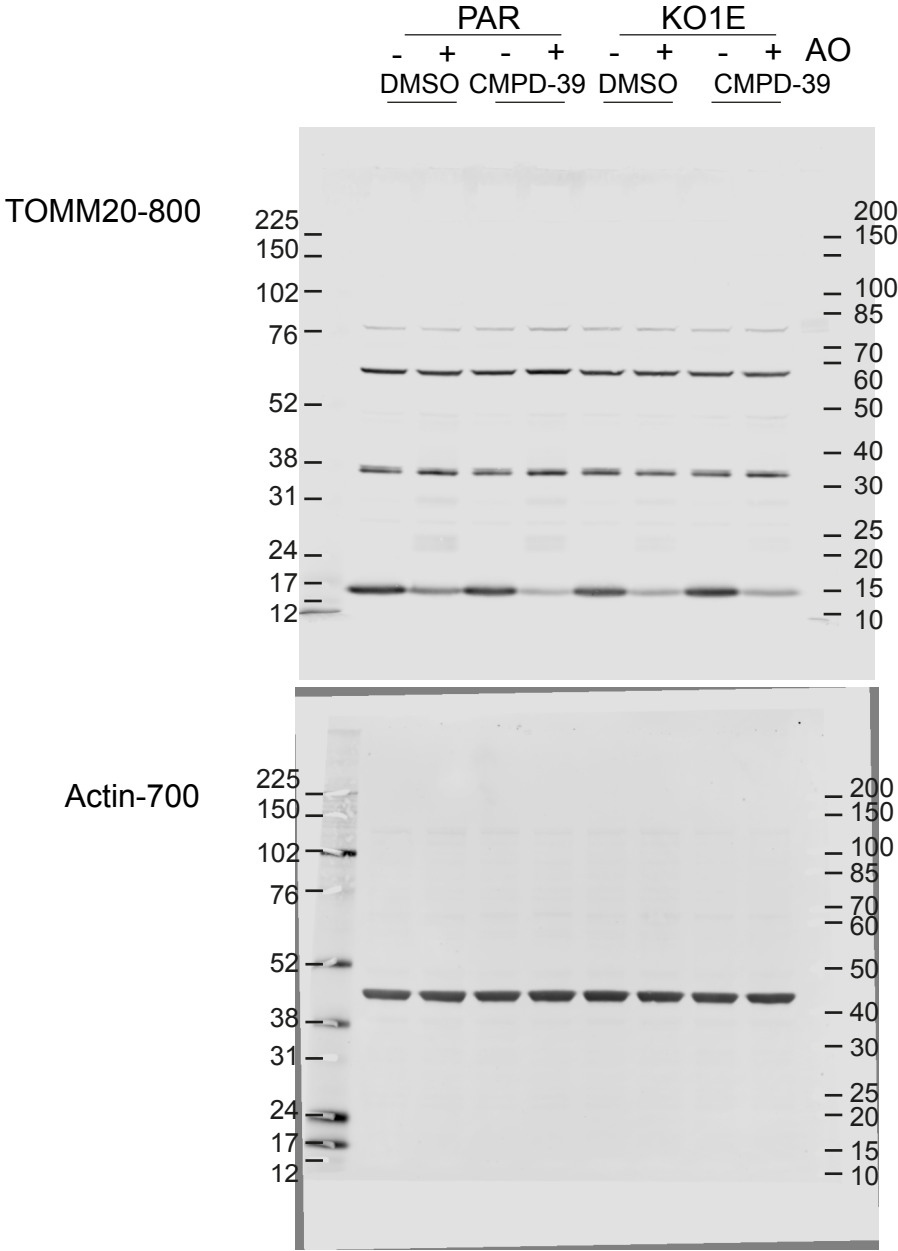

Source Data: Figure 2B  
Blot1

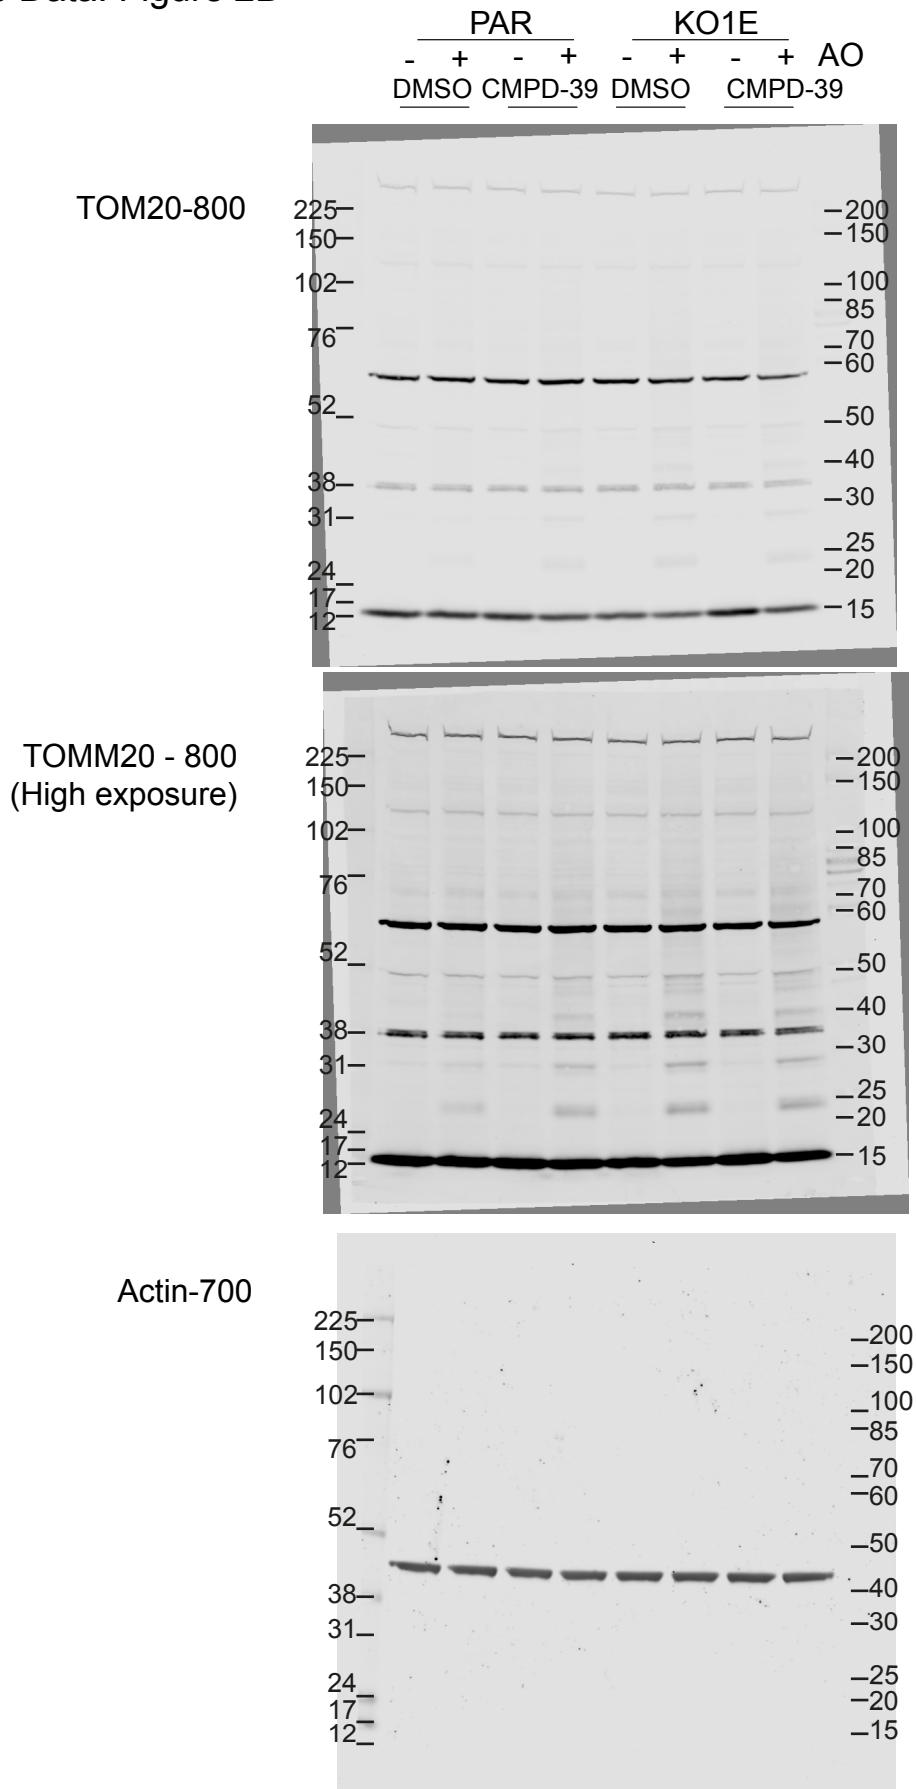

Source Data: Figure 2B

Blot2

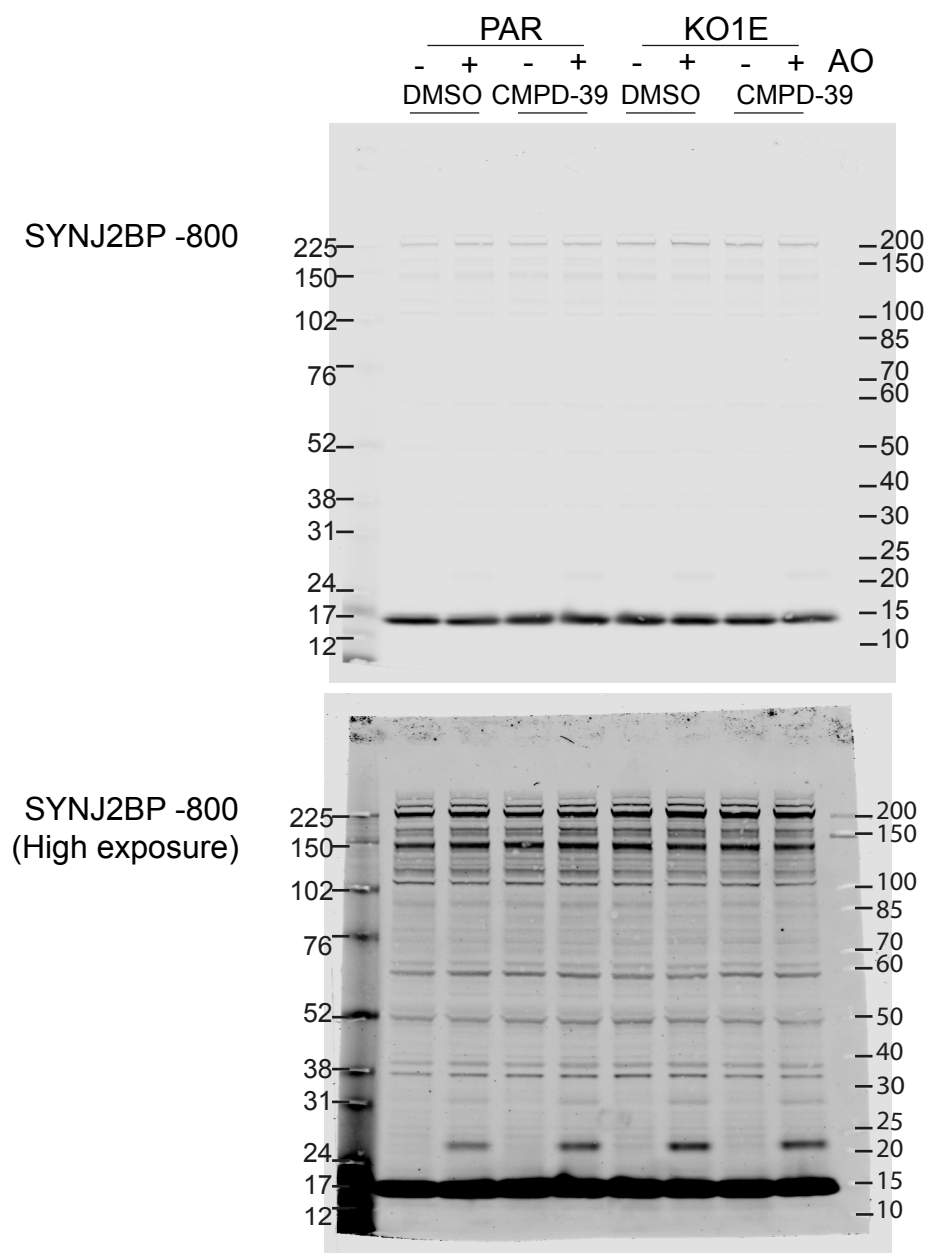

Source Data: Figure 2B

Blot2 Cont.

Reprobed for USP30 - 800  
(After SYNJ2BP)

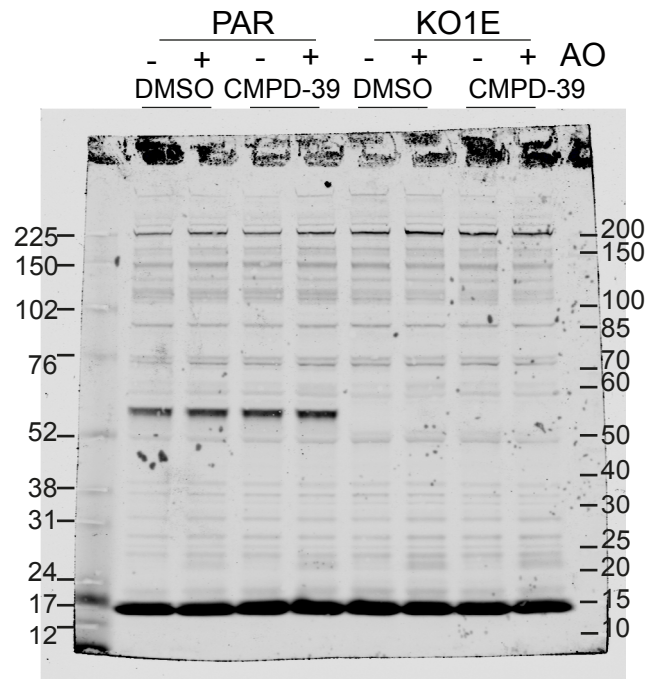

Actin-700

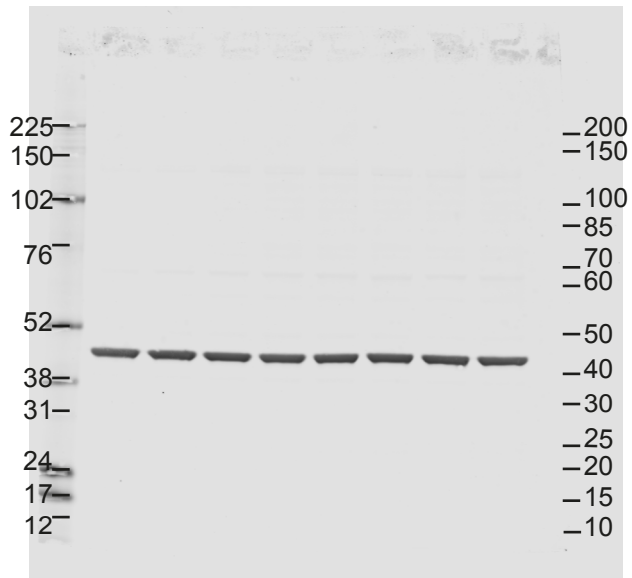

Source Data: Figure 2E

Blot1

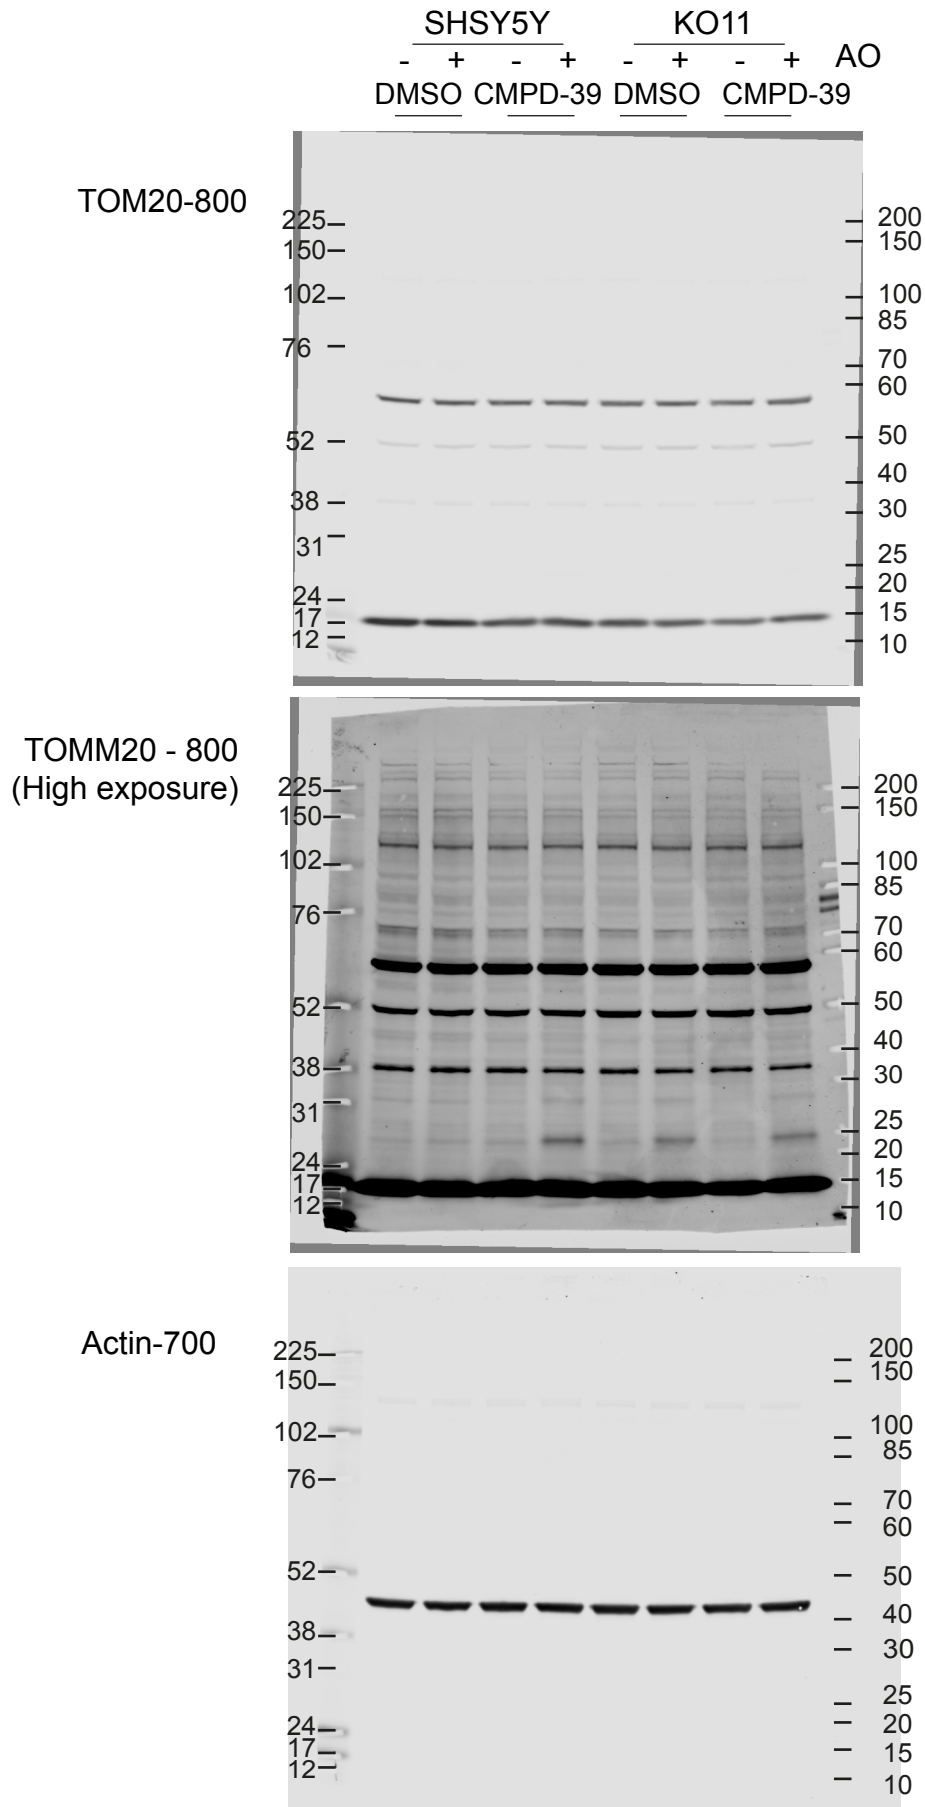

Source Data: Figure 2E

Blot2

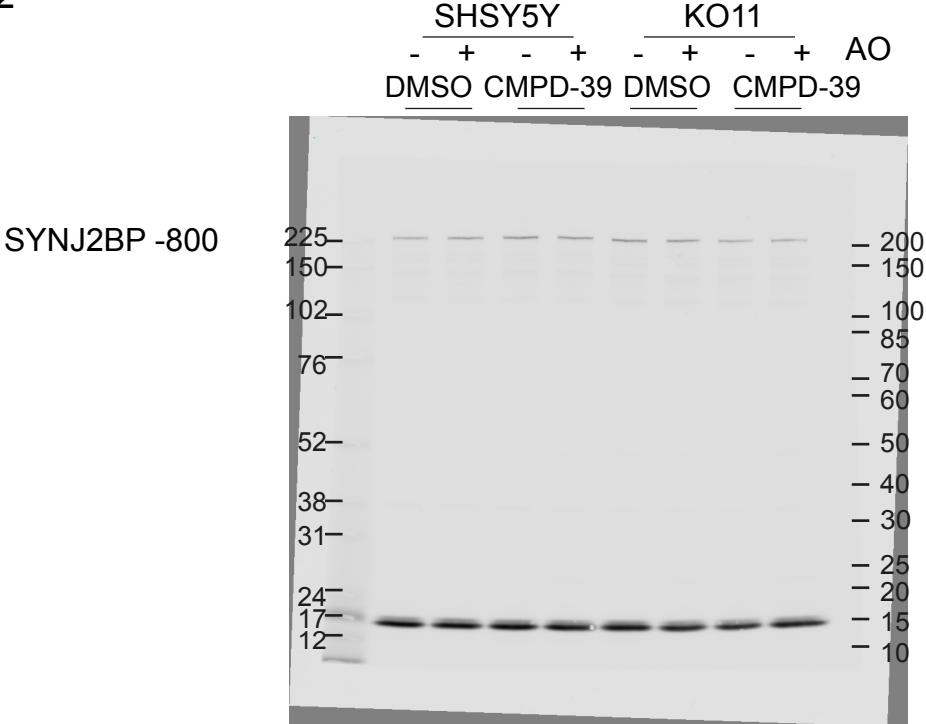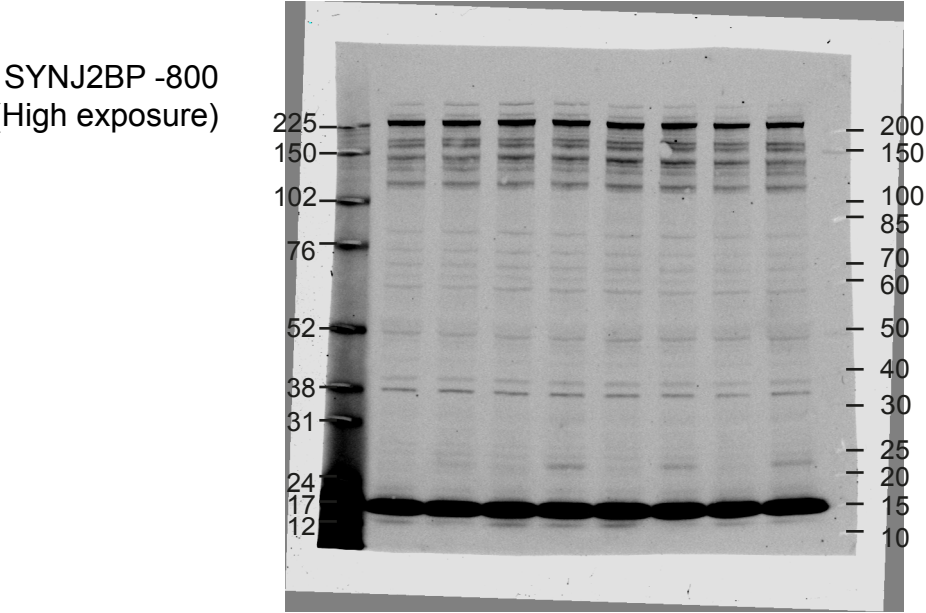

Source Data: Figure 2E

Blot2 Cont.

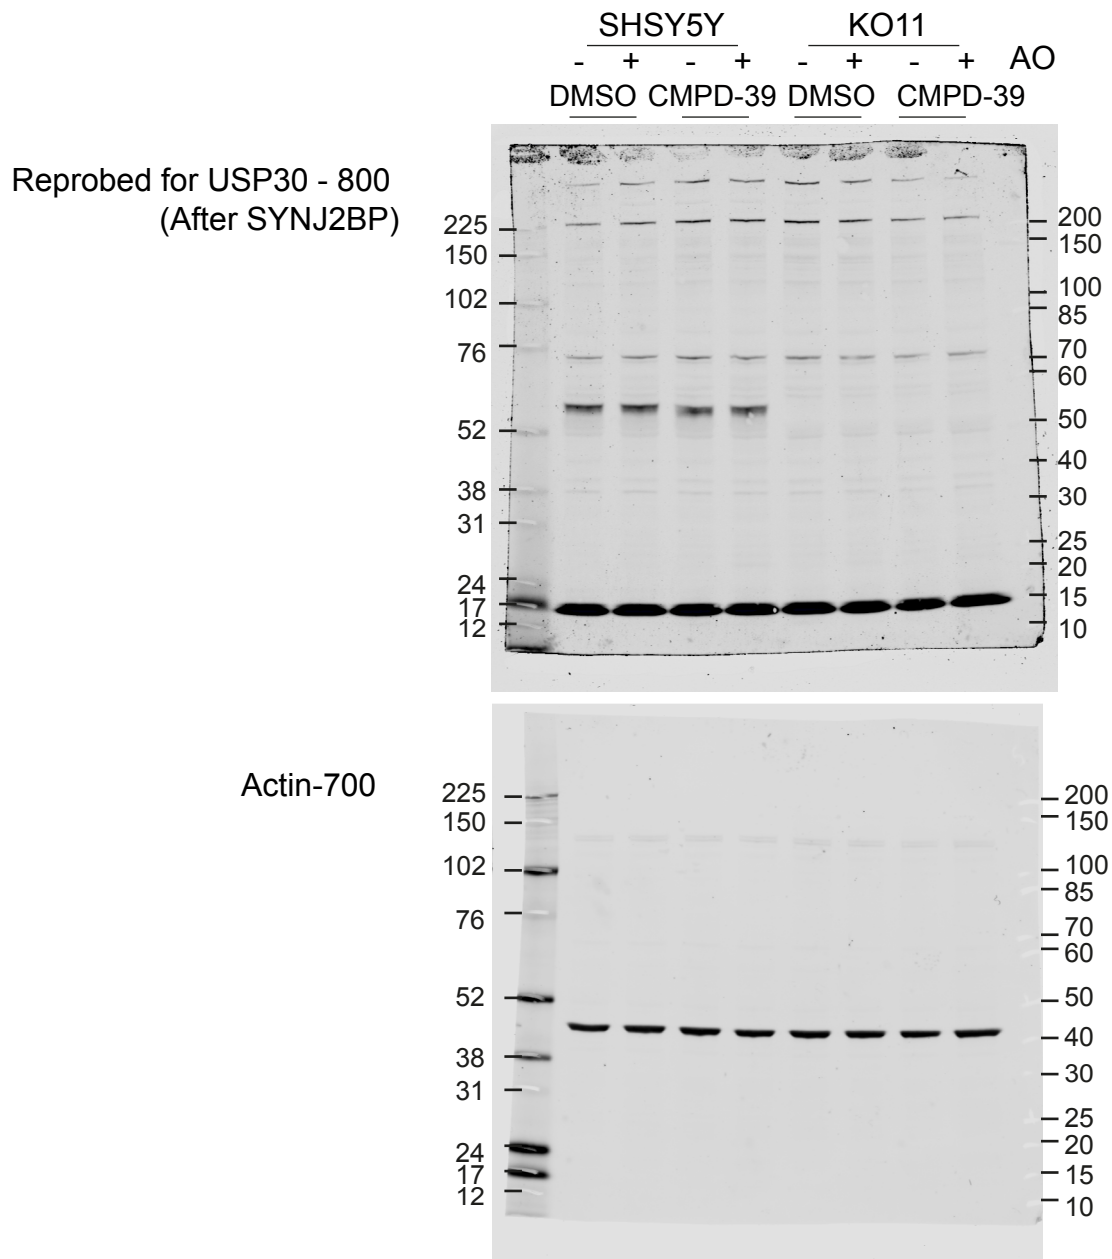

Source Data: Figure 2E

Blot3

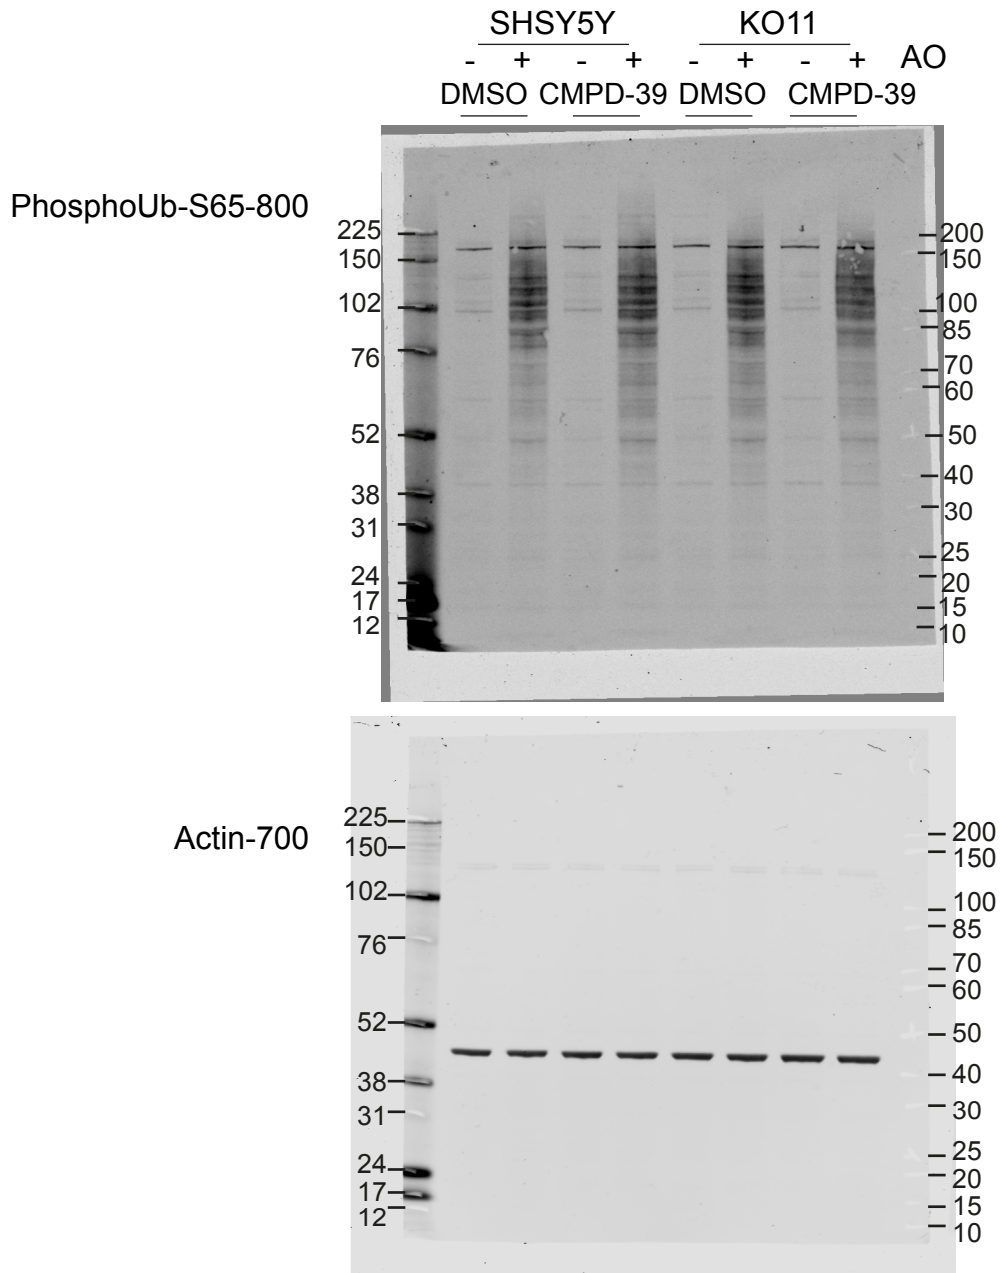

Supplement: LSA-2021-01287_SdataF2.3.pdf [file LSA-2021-01287_SdataF2.3.pdf]
