# Supplementary material for: Benchmarking a highly selective USP30 inhibitor for enhancement of mitophagy and pexophagy
Source: Life Sci Alliance. 2021 Nov 29;5(2):e202101287. doi: 10.26508/lsa.202101287 (PMC8645336; doi:10.26508/lsa.202101287)
Supplement: Supplementary file 1 [file LSA-2021-01287_SdataF1.xlsx]

## Sheet: Fig 1B
Mean Activity (% Control)*
* % Control = ((sample - mean no enzyme)/(mean plus enzyme - mean no enzyme))*100
	CMPD-39 Concentration (µM)
	100	10	1
USP1/UAF1	97.4431	95.6499	98.583
USP2	101.16	97.6945	107.139
USP4	98.94	102.97	106.754
USP5	106.195	100.628	104.147
USP6	90.5636	96.8268	101.292
USP7	94.0608	98.4238	106.318
USP8	101.689	100.375	105.286
USP9x	98.3484	108.464	103.823
USP11	97.1698	98.4351	102.614
USP12/UAF1/WDR20	103.902	106.028	113.711
USP14 (+Proteasome-VS@Kd)	96.1207	100.39	107.329
USP15	98.0753	100.523	103.167
USP16	103.525	100.134	110.957
USP17	101.924	119.279	109.953
USP19	99.7986	99.6997	107.309
USP20	155.079	109.63	113.022
USP21	90.9323	93.9911	101.647
USP25	103.093	94.4574	103.42
USP27x	93.3757	93.788	107.69
USP28	102.214	94.2364	96.4733
USP30	3.27142	0.500139	0.756121
USP35**	101.712	101.024	112.661
USP36	94.8212	98.8171	109.893
USP45	100.407	95.0422	98.8003
USP46/UAF1/WDR20	97.3957	97.5344	110.232
CYLD	98.0267	102.392	107.335
UCHL1	96.2938	98.5196	102.615
UCHL3	97.5973	98.7788	107.22
UCHL5	100.706	98.0175	106.735
BAP1	96.5486	89.0292	104.193
OTU1	100.715	97.7672	105.479
OTUB2	97.3122	97.5488	102.759
OTUD1	97.9795	93.3565	99.863
OTUD3	107.02	100.925	105.035
OTUD5 (p177S)	89.8667	105.932	107.559
OTUD6A	101.238	99.3475	102.767
OTUD6B	100.511	100.317	109.752
Cezanne	94.45	98.8193	98.6844
VCPIP	95.6416	96.4594	108.778
AMSH-LP	111.568	101.905	109.036
AMSH-LP (+Zinc)	97.8429	101.01	105.954
Ataxin3	100.747	102.286	102.496
Ataxin3L	102.218	100.551	102.877
JOSD1	103.305	99.568	98.1201
JOSD2	94.2909	90.7979	104.573

## Sheet: Fig 1C
Figure 1C
USP30 Unbound		Image Name	Channel	Name	Signal			Percentage unbound by probe
	No Probe	0003735_02	800	1	2090000		No Probe	100.002
	DMSO	0003735_02	800	2	623000		DMSO	35.5391
	10	0003735_02	800	3	1330000		10	64.1582
	50	0003735_02	800	4	1580000		50	86.5279
	100	0003735_02	800	5	1920000		100	92.7536
	200	0003735_02	800	6	1830000		200	93.702
	1000	0003735_02	800	7	2100000		1000	97.2898
USP30 Probe Bound		Image Name	Channel	Name	Signal
	No Probe	0003735_02	800	8	-49
	DMSO	0003735_02	800	9	1130000
	10	0003735_02	800	10	743000
	50	0003735_02	800	11	246000
	100	0003735_02	800	12	150000
	200	0003735_02	800	13	123000
	1000	0003735_02	800	14	58500

## Sheet: Fig1D
Figure 1D
TOM20 Total		Image Name	Channel	Name	Signal			Percentage ubiquitinated
	DMSO	0011098_01	800	1	138000		DMSO	-0.00594963
	CMPD39	0011098_01	800	2	138000		CMPD39	0.0631485
	AO	0011098_01	800	3	107000		AO	1.24596
	AO+10nM CMPD39	0011098_01	800	4	113000		AO+10nM CMPD39	1.61936
	AO+50nM CMPD39	0011098_01	800	5	116000		AO+50nM CMPD39	2.184
	AO+100nM CMPD39	0011098_01	800	6	90400		AO+100nM CMPD39	2.5967
	AO+200nM CMPD39	0011098_01	800	7	125000		AO+200nM CMPD39	3.2882
	AO+1000nM CMPD39	0011098_01	800	8	113000		AO+1000nM CMPD39	3.33618
TOM20 Ub		Image Name	Channel	Name	Signal
	DMSO	0011098_01	800	9	-8.21
	CMPD39	0011098_01	800	10	87.2
	AO	0011098_01	800	11	1350
	AO+10nM CMPD39	0011098_01	800	12	1860
	AO+50nM CMPD39	0011098_01	800	13	2590
	AO+100nM CMPD39	0011098_01	800	14	2410
	AO+200nM CMPD39	0011098_01	800	15	4250
	AO+1000nM CMPD39	0011098_01	800	16	3900
