# Supplementary material for: Benchmarking a highly selective USP30 inhibitor for enhancement of mitophagy and pexophagy
Source: Life Sci Alliance. 2021 Nov 29;5(2):e202101287. doi: 10.26508/lsa.202101287 (PMC8645336; doi:10.26508/lsa.202101287)
Supplement: Supplementary file 5 [file LSA-2021-01287_SdataF3.xlsx]

## Sheet: Fig 3B 
No. of mitolysosomes per cell
	96h DMSO			96h CMPD-39 200nM			96h CMPD-39 500nM			96h CMPD-39 1000nM					Dunnett's multiple comparisons test	Mean Diff.	95.00% CI of diff.	Below threshold?	Summary	Adjusted P Value	A-?
Cell ID	1st	2nd	3rd	1st	2nd	3rd	1st	2nd	3rd	1st	2nd	3rd			96h DMSO vs. 96h CMPD-39 200nM	0.2462	-1.295 to 1.788	No	ns	0.9652	B	96h CMPD-39 200nM
1	3	7	1	1	1	2	2	1	2	2	4	3			96h DMSO vs. 96h CMPD-39 500nM	-1.036	-2.578 to 0.5057	No	ns	0.2645	C	96h CMPD-39 500nM
2	3	2	14	0	0	1	2	1	1	6	2	1			96h DMSO vs. 96h CMPD-39 1000nM	-1.897	-3.439 to -0.3558	Yes	*	0.0111	D	96h CMPD-39 1000nM
3	0	11	5	0	7	1	3	0	7	7	0	2
4	3	5	3	2	0	1	0	0	6	26	18	0			Test details	Mean 1	Mean 2	Mean Diff.	SE of diff.	n1	n2	q	DF
5	0	2	1	2	0	1	1	0	19	15	2	6			96h DMSO vs. 96h CMPD-39 200nM	2.954	2.708	0.2462	0.6524	65	65	0.3773	256
6	4	1	1	1	0	1	8	1	2	0	2	1			96h DMSO vs. 96h CMPD-39 500nM	2.954	3.99	-1.036	0.6524	65	65	1.588	256
7	8	2	1	0	0	10	0	0	0	18	3	5			96h DMSO vs. 96h CMPD-39 1000nM	2.954	4.851	-1.897	0.6524	65	65	2.909	256
8	3	2	1	2	0	4	2	3	0	12	1	0
9	1	1	0	1	6	4	0	22	3	5	0	3
10	0	1	0	4	0	0	1	0	1	7	6	1
11	0	1	0	0	3	3	2	1	0	5	7	1
12	2	1	2	2	1	2	2	5	4	5	2	4
13	4	3	2	1	17	2	5	5	2	10	3	9
14	3	12	0	0	4	0	29	1	2	0	6	1
15	2	2	0	5	3	2	1	0	1	3	11	0
16	0	5	0	1	2	1	1	1	1	6	10	0
17	1	1	1	1	1	0	2	0	1	39	4	0
18	0	1	0	1	19	5	3	0	2	1	2	1
19	0	1	0	0	5	2	5	0	14	44	4	14
20	1	2	0	1	4	0	0	2	2	2	5	6
21	2	1	1	2	3	1	0	1	4	1	49	1
22	1	1	22	0	8	0	4	0	5	1	0	7
23	5	0	1	0	7	1	5	5	17	1	12	5
24	29	0	0	2	2	1	0	3	4	0	8	2
25	6	2	1	2	3	1	8	3	4	0	1	3
26	4	1	1	2	0	3	3	45	2	2	1	29
27	2	2	2	1	6	0	1	17	0	0	0	9
28	22	3	4	0	4	1	5	13	2	0	3	4
29	1	1	0	0	6	1	0	2	2	0	1	1
30	2	1	4	0	8	3	28	4	1	1	0	0
31	3	2	0	0	0	0	5	5	4	18	2	1
32	1	0	3	4	1	1	0	8	8	5	1	0
33	3	0	3	2	3	3	2	0	7	9	10	1
34	1	0	0	0	3	3	0	6	1	5	1	1
35	7	1	5	0	7	0	7	7	4	4	3	0
36	0	7	5	1	4	0	9	2	79	1	4	2
37	9	2	5	0	0	4	3	16	16	7	3	4
38	4	16	6	0	1	0	3	3	0	7	7	1
39	4	9	9	2	6	1	0	9	9	1	1	1
40	3	1	2	1	2	3	0	11	0	7	7	0
41	1	1	4	2	4	2	3	1	4	41	17	2
42	7	0	7	0	3	0	2	1	1	0	12	3
43	0	1	13	16	12	0	0	15	0	6	4	1
44	1	1	2	8	2	1	0	4	4	3	0	0
45	0	2	4	3	1	0	2	4	6	8	0	2
46	1	2	1	2	1	1	5	0	6	10	1	8
47	1	3	0	5	1	1	2	0	0	1	2	1
48	1	2	1	6	1	1	1	0	0	14	0	0
49	0	3	1	2	0	0	3	3	0	12	2	0
50	1	1	1	2	0	2	12	1	0	3	2	3
51	1	1	0	4	1	3	0	0	0	7	1	0
52	3	1	2	5	1	4	4	0	0	14	4	2
53	1	1	0	2	19	4	6	0	10	4	6	1
54	12	7	0	1	5	0	1	0	0	8	2	0
55	0	2	0	3	2	0	1	4	2	3	8	0
56	3	1	1	10	0	0	0	10	3	6	7	0
57	1	7	2	2	2	0	7	2	0	4	21	0
58	3	0	1	2	4	3	1	1	1	20	2	1
59	4	3	0	24	0	0	0	0	11	1	6	0
60	5	7	1	2	4	0	7	0	5	4	6	1
61	0	5	4	3	10	0	8	17	1	2	1	0
62	0	14	0	0	16	1	2	1	2	1	2	2
63	9	25	5	4	28	5	10	3	0	2	0	2
64	1	4	1	0	3	7	2	1	0	1	3	6
65	2	6	1	0	2	3	5	0	0	1	6	1

## Sheet: Fig 3C
Mean Area of mitolysosomes per cell
	96h DMSO			96h CMPD-39 200nM			96h CMPD-39 500nM			96h CMPD-39 1000nM					Dunnett's multiple comparisons test	Mean Diff.	95.00% CI of diff.	Below threshold?	Summary	Adjusted P Value	A-?
Cell ID	1st	2nd	3rd	1st	2nd	3rd	1st	2nd	3rd	1st	2nd	3rd			96h DMSO vs. 96h CMPD-39 200nM	-0.05402	-0.1438 to 0.03575	No	ns	0.3501	B	96h CMPD-39 200nM
1	0.06	0.019	0.045	0	0.045	0.246	0	2.732	0.336	0.426	0.537	0.119			96h DMSO vs. 96h CMPD-39 500nM	-0.111	-0.2008 to -0.02127	Yes	*	0.0106	C	96h CMPD-39 500nM
2	1.15	0.224	0.403	0	0	0.627	0	0.134	0	0.485	1.053	0.179			96h DMSO vs. 96h CMPD-39 1000nM	-0.1329	-0.2227 to -0.04311	Yes	**	0.0016	D	96h CMPD-39 1000nM
3	0	0.175	0.6	0	0.122	0.224	0.03	0	0.921	0.55	0	0.493
4	0.105	0.26	0.045	0.291	0	0.403	0	0	0.747	0.451	1.107	0			Test details	Mean 1	Mean 2	Mean Diff.	SE of diff.	n1	n2	q	DF
5	0	0.246	0.045	0.134	0	0.09	0	0	0.427	0.376	0.022	0.254			96h DMSO vs. 96h CMPD-39 200nM	0.1755	0.2296	-0.05402	0.03799	65	65	1.422	256
6	0.067	0.134	0.045	0.09	0	0.134	0.392	0.134	0.202	0	0.179	0.134			96h DMSO vs. 96h CMPD-39 500nM	0.1755	0.2866	-0.111	0.03799	65	65	2.923	256
7	0.42	0	0.045	0	0	0.708	0	0	0	0.239	0.075	0.116			96h DMSO vs. 96h CMPD-39 1000nM	0.1755	0.3084	-0.1329	0.03799	65	65	3.498	256
8	0.433	0.067	0.493	0.045	0	0.146	0.179	0.209	0	0.321	0.179	0
9	0.134	0	0	0.582	0.194	0.168	0	0.894	0.09	0.036	0	0.06
10	0	0.045	0	0.056	0	0	0.045	0	0	0.499	0.082	0.045
11	0	0	0	0	0.105	0.403	0.045	0.134	0	0.081	0.282	0.806
12	0.336	0.045	0.134	0.47	0.045	1.12	0.09	0.063	0.246	0.269	1.993	0.101
13	0.202	0.134	0	0	0.266	0.134	0.224	0.206	0.179	0.372	0.761	0.204
14	0.105	0.34	0	0	0.493	0	0.799	0	0.157	0	0.403	0.403
15	0	0.224	0	0.161	0.941	0.112	0.314	0	0	0.582	1.051	0
16	0	0.788	0	0.045	0.179	0.09	0.045	0.224	0.09	0.276	0.349	0
17	0	0.09	0.09	0.179	0	0	0	0	0	0.771	0.134	0
18	0	0	0	0.045	1.221	0.385	0.015	0	0	0.224	0.224	0.09
19	0	0	0	0	2.087	0.112	0.233	0	0.707	0.418	0	0.758
20	0.09	0.179	0	0.045	0.694	0	0	0.157	0.269	0.09	0.063	0.403
21	0.09	0.09	0.09	0.224	0.015	0.448	0	0	0.493	0	0.778	0
22	0.09	0	0.254	0	0.101	0	0.179	0	0.09	0.448	0	0.205
23	0.591	0	0	0	0.147	0.314	0.224	0.699	1.115	1.389	0.892	0.376
24	0.412	0	0	0.112	0.022	0	0	0.702	0.358	0	0.146	0.112
25	0.127	0.09	0.134	0.358	0.657	0.045	0.174	0.06	0.101	0	0	0.015
26	0.045	0.045	0	0.47	0	0.433	0.463	0.751	0.045	1.635	0.045	0.419
27	0.179	0.112	1.904	0.134	0.687	0	0.09	0.34	0	0	0	0.756
28	0.277	0.09	0.213	0	0.157	0.179	0.179	0.417	0.47	0	0.299	0.045
29	0.448	0	0	0	0.082	0.224	0	0.291	0.022	0	0.134	0.134
30	0.112	0.045	1.713	0	0.952	0.732	1.022	0.112	3.404	0.941	0	0
31	0.209	0.045	0	0	0	0	1.729	0.081	0.235	0.353	0.067	0.493
32	0.045	0	0.015	0.034	0.224	0.045	0	0.224	0.218	0.125	0.09	0
33	0.045	0	0.149	0.157	0.239	0.911	0.179	0	0.921	0.358	0.314	0
34	0	0	0	0	0.149	0.314	0	1.15	0.224	0.564	0.269	0
35	0.058	0	0.305	0	0.045	0	0.122	0.493	0.179	0.314	0.06	0
36	0	0.448	0.215	0.806	0.47	0	0.259	0.157	0.907	0.627	0.605	0.761
37	0.348	0.045	0.009	0	0	0.426	0.03	0.736	0.252	0.186	0.314	0.325
38	0.347	0.311	0.314	0	0	0	0.179	0.866	0	0.416	0.506	0
39	0.179	0.562	0.139	0.157	0.433	0	0	0.373	1.194	1.657	0	0.403
40	0.105	0.224	0.067	0	0.067	0.224	0	0.44	0	0.909	0.288	0
41	0.179	0	0.179	2.867	0.414	0	0.523	0.896	0.918	0.516	0.943	0.873
42	0.058	0	0.454	0	0.119	0	0.269	0	0.985	0	0.694	0.015
43	0	0.403	0.823	0.487	0.877	0	0	0.305	0	0.47	0.571	0.493
44	0.09	0	0.269	0.437	0	0	0	1.265	1.209	0.358	0	0
45	0	0.269	0	0.358	0	0	0.067	0.862	0.328	0.202	0	0.246
46	0.045	0.179	0	0.179	0.134	0.672	0.143	0	0.724	0.211	0	0.896
47	0.045	0.254	0	0.152	0	0.403	0.202	0	0	0.045	0.134	0.045
48	0.269	0.045	0.269	0.478	0.134	0.09	0	0	0	0.339	0	0
49	0	0.314	0.045	0.179	0	0	0.388	0.254	0	0.407	0.022	0
50	0	0.09	0	0.067	0	0.224	0.366	0	0	0.493	0.493	0.328
51	0.045	1.165	0	0.134	0.179	0.537	0	0	0	0.096	0.179	0
52	0.09	0.224	0.045	0.412	0.448	0.168	0.101	0	0	0.314	0.75	0.022
53	0.224	0.09	0	0.157	0.184	0.112	0.097	0	0.103	0.134	0.933	0.761
54	0.019	0.563	0	0.224	0.045	0	0.224	0	0	0.47	0.022	0
55	0	0	0	0.03	0.806	0	0	1.008	0	0.06	0.482	0
56	0.06	0.09	1.03	0.699	0	0	0	0.112	0.552	0.537	0.026	0
57	0	0.102	0.022	0.582	0	0	0.186	0.045	0	0.593	0.264	0
58	0.328	0	0.09	0.246	0.056	0.09	0	0.314	0	0.549	0.179	0.493
59	0.179	0.015	0	0.623	0	0	0	0	1.34	0.314	0.306	0
60	0.134	0.512	0	0.56	0.09	0	0.403	0	0.699	0.022	0.097	2.374
61	0	0.206	0.202	0.224	0.426	0	0.364	0.572	1.165	0.426	0.314	0
62	0	0.237	0	0	1.54	0	0.403	0.717	0.515	0.09	0.09	0
63	0.05	0.346	0.26	0.213	1.08	0.224	0.403	0.06	0	0.537	0	0.806
64	0	0.022	1.792	0	0.523	0.601	0.224	1.702	0	0	0.627	0.127
65	0.022	0.194	2.24	0	0.224	0.224	0.251	0	0	0.358	0.007	0.09

## Sheet: Fig 3D
Figure 3D
																Tukey's multiple comparisons test	Mean Diff.	95.00% CI of diff.	Significant?	Summary	Adjusted P Value
		Untreated			Vehicle			100 nM			1000 nM
	control A	6.13733	5.54333	7.01034	6.2244	5.36256	5.91044	6.60351	8.48744	6.57736	7.89743	7.82058	6.27336			control A:Untreated vs. control A:Vehicle	0.3979	-1.473 to 2.268	No	ns	>0.9999
	control B	5.77643	6.10552	5.16726	6.26901	5.99297	5.88945	7.09828	7.16788	6.8039	7.23628	6.47037	7.60042			control A:Untreated vs. control A:100 nM	-0.9924	-2.863 to 0.8781	No	ns	0.8251
	parkin A	2.38946	1.952	2.04029	2.44077	2.4098	2.72959	4.35996	4.99049	3.06923	5.13978	5.53573	4.972			control A:Untreated vs. control A:1000 nM	-1.1	-2.971 to 0.7704	No	ns	0.7029
	parkin B	1.81037	2.97315	2.96558	2.40163	1.54498	2.60657	4.05697	3.91086	4.886	4.68386	3.88096	5.3327			control A:Untreated vs. control B:Untreated	0.5473	-1.323 to 2.418	No	ns	0.9989
																control A:Untreated vs. control B:Vehicle	0.1799	-1.691 to 2.050	No	ns	>0.9999
																control A:Untreated vs. control B:100 nM	-0.793	-2.664 to 1.077	No	ns	0.9624
																control A:Untreated vs. control B:1000 nM	-0.872	-2.743 to 0.9985	No	ns	0.9232
																control A:Untreated vs. parkin A:Untreated	4.103	2.233 to 5.974	Yes	****	<0.0001
																control A:Untreated vs. parkin A:Vehicle	3.704	1.833 to 5.574	Yes	****	<0.0001
																control A:Untreated vs. parkin A:100 nM	2.09	0.2199 to 3.961	Yes	*	0.0171
																control A:Untreated vs. parkin A:1000 nM	1.014	-0.8560 to 2.885	No	ns	0.8023
																control A:Untreated vs. parkin B:Untreated	3.647	1.777 to 5.518	Yes	****	<0.0001
																control A:Untreated vs. parkin B:Vehicle	4.046	2.175 to 5.916	Yes	****	<0.0001
																control A:Untreated vs. parkin B:100 nM	1.946	0.07520 to 3.816	Yes	*	0.035
																control A:Untreated vs. parkin B:1000 nM	1.598	-0.2727 to 3.468	No	ns	0.1627
																control A:Vehicle vs. control A:100 nM	-1.39	-3.261 to 0.4802	No	ns	0.3414
																control A:Vehicle vs. control A:1000 nM	-1.498	-3.369 to 0.3725	No	ns	0.2371
																control A:Vehicle vs. control B:Untreated	0.1494	-1.721 to 2.020	No	ns	>0.9999
																control A:Vehicle vs. control B:Vehicle	-0.218	-2.089 to 1.653	No	ns	>0.9999
																control A:Vehicle vs. control B:100 nM	-1.191	-3.061 to 0.6796	No	ns	0.5863
																control A:Vehicle vs. control B:1000 nM	-1.27	-3.140 to 0.6006	No	ns	0.484
																control A:Vehicle vs. parkin A:Untreated	3.705	1.835 to 5.576	Yes	****	<0.0001
																control A:Vehicle vs. parkin A:Vehicle	3.306	1.435 to 5.176	Yes	****	<0.0001
																control A:Vehicle vs. parkin A:100 nM	1.693	-0.1779 to 3.563	No	ns	0.1105
																control A:Vehicle vs. parkin A:1000 nM	0.6166	-1.254 to 2.487	No	ns	0.9962
																control A:Vehicle vs. parkin B:Untreated	3.249	1.379 to 5.120	Yes	****	<0.0001
																control A:Vehicle vs. parkin B:Vehicle	3.648	1.778 to 5.519	Yes	****	<0.0001
																control A:Vehicle vs. parkin B:100 nM	1.548	-0.3227 to 3.418	No	ns	0.1973
																control A:Vehicle vs. parkin B:1000 nM	1.2	-0.6706 to 3.070	No	ns	0.5744
																control A:100 nM vs. control A:1000 nM	-0.1077	-1.978 to 1.763	No	ns	>0.9999
																control A:100 nM vs. control B:Untreated	1.54	-0.3308 to 3.410	No	ns	0.2035
																control A:100 nM vs. control B:Vehicle	1.172	-0.6982 to 3.043	No	ns	0.6106
																control A:100 nM vs. control B:100 nM	0.1994	-1.671 to 2.070	No	ns	>0.9999
																control A:100 nM vs. control B:1000 nM	0.1204	-1.750 to 1.991	No	ns	>0.9999
																control A:100 nM vs. parkin A:Untreated	5.096	3.225 to 6.966	Yes	****	<0.0001
																control A:100 nM vs. parkin A:Vehicle	4.696	2.826 to 6.567	Yes	****	<0.0001
																control A:100 nM vs. parkin A:100 nM	3.083	1.212 to 4.953	Yes	****	<0.0001
																control A:100 nM vs. parkin A:1000 nM	2.007	0.1364 to 3.877	Yes	*	0.026
																control A:100 nM vs. parkin B:Untreated	4.64	2.769 to 6.510	Yes	****	<0.0001
																control A:100 nM vs. parkin B:Vehicle	5.038	3.168 to 6.909	Yes	****	<0.0001
																control A:100 nM vs. parkin B:100 nM	2.938	1.068 to 4.809	Yes	***	0.0002
																control A:100 nM vs. parkin B:1000 nM	2.59	0.7197 to 4.461	Yes	**	0.0012
																control A:1000 nM vs. control B:Untreated	1.647	-0.2231 to 3.518	No	ns	0.1333
																control A:1000 nM vs. control B:Vehicle	1.28	-0.5905 to 3.150	No	ns	0.4713
																control A:1000 nM vs. control B:100 nM	0.3071	-1.563 to 2.178	No	ns	>0.9999
																control A:1000 nM vs. control B:1000 nM	0.2281	-1.642 to 2.099	No	ns	>0.9999
																control A:1000 nM vs. parkin A:Untreated	5.203	3.333 to 7.074	Yes	****	<0.0001
																control A:1000 nM vs. parkin A:Vehicle	4.804	2.933 to 6.674	Yes	****	<0.0001
																control A:1000 nM vs. parkin A:100 nM	3.191	1.320 to 5.061	Yes	****	<0.0001
																control A:1000 nM vs. parkin A:1000 nM	2.115	0.2441 to 3.985	Yes	*	0.0152
																control A:1000 nM vs. parkin B:Untreated	4.747	2.877 to 6.618	Yes	****	<0.0001
																control A:1000 nM vs. parkin B:Vehicle	5.146	3.276 to 7.017	Yes	****	<0.0001
																control A:1000 nM vs. parkin B:100 nM	3.046	1.175 to 4.916	Yes	****	<0.0001
																control A:1000 nM vs. parkin B:1000 nM	2.698	0.8274 to 4.568	Yes	***	0.0007
																control B:Untreated vs. control B:Vehicle	-0.3674	-2.238 to 1.503	No	ns	>0.9999
																control B:Untreated vs. control B:100 nM	-1.34	-3.211 to 0.5302	No	ns	0.3978
																control B:Untreated vs. control B:1000 nM	-1.419	-3.290 to 0.4512	No	ns	0.3109
																control B:Untreated vs. parkin A:Untreated	3.556	1.685 to 5.426	Yes	****	<0.0001
																control B:Untreated vs. parkin A:Vehicle	3.156	1.286 to 5.027	Yes	****	<0.0001
																control B:Untreated vs. parkin A:100 nM	1.543	-0.3273 to 3.414	No	ns	0.2008
																control B:Untreated vs. parkin A:1000 nM	0.4672	-1.403 to 2.338	No	ns	0.9998
																control B:Untreated vs. parkin B:Untreated	3.1	1.230 to 4.971	Yes	****	<0.0001
																control B:Untreated vs. parkin B:Vehicle	3.499	1.628 to 5.369	Yes	****	<0.0001
																control B:Untreated vs. parkin B:100 nM	1.398	-0.4721 to 3.269	No	ns	0.3327
																control B:Untreated vs. parkin B:1000 nM	1.051	-0.8200 to 2.921	No	ns	0.7623
																control B:Vehicle vs. control B:100 nM	-0.9729	-2.843 to 0.8976	No	ns	0.8441
																control B:Vehicle vs. control B:1000 nM	-1.052	-2.922 to 0.8186	No	ns	0.7608
																control B:Vehicle vs. parkin A:Untreated	3.923	2.053 to 5.794	Yes	****	<0.0001
																control B:Vehicle vs. parkin A:Vehicle	3.524	1.653 to 5.394	Yes	****	<0.0001
																control B:Vehicle vs. parkin A:100 nM	1.911	0.04006 to 3.781	Yes	*	0.0414
																control B:Vehicle vs. parkin A:1000 nM	0.8346	-1.036 to 2.705	No	ns	0.9442
																control B:Vehicle vs. parkin B:Untreated	3.467	1.597 to 5.338	Yes	****	<0.0001
																control B:Vehicle vs. parkin B:Vehicle	3.866	1.996 to 5.737	Yes	****	<0.0001
																control B:Vehicle vs. parkin B:100 nM	1.766	-0.1047 to 3.636	No	ns	0.0805
																control B:Vehicle vs. parkin B:1000 nM	1.418	-0.4525 to 3.288	No	ns	0.3123
																control B:100 nM vs. control B:1000 nM	-0.079	-1.950 to 1.792	No	ns	>0.9999
																control B:100 nM vs. parkin A:Untreated	4.896	3.026 to 6.767	Yes	****	<0.0001
																control B:100 nM vs. parkin A:Vehicle	4.497	2.626 to 6.367	Yes	****	<0.0001
																control B:100 nM vs. parkin A:100 nM	2.883	1.013 to 4.754	Yes	***	0.0002
																control B:100 nM vs. parkin A:1000 nM	1.808	-0.06300 to 3.678	No	ns	0.0668
																control B:100 nM vs. parkin B:Untreated	4.44	2.570 to 6.311	Yes	****	<0.0001
																control B:100 nM vs. parkin B:Vehicle	4.839	2.968 to 6.709	Yes	****	<0.0001
																control B:100 nM vs. parkin B:100 nM	2.739	0.8682 to 4.609	Yes	***	0.0005
																control B:100 nM vs. parkin B:1000 nM	2.391	0.5203 to 4.261	Yes	**	0.0036
																control B:1000 nM vs. parkin A:Untreated	4.975	3.105 to 6.846	Yes	****	<0.0001
																control B:1000 nM vs. parkin A:Vehicle	4.576	2.705 to 6.446	Yes	****	<0.0001
																control B:1000 nM vs. parkin A:100 nM	2.962	1.092 to 4.833	Yes	***	0.0002
																control B:1000 nM vs. parkin A:1000 nM	1.887	0.01600 to 3.757	Yes	*	0.0464
																control B:1000 nM vs. parkin B:Untreated	4.519	2.649 to 6.390	Yes	****	<0.0001
																control B:1000 nM vs. parkin B:Vehicle	4.918	3.047 to 6.788	Yes	****	<0.0001
																control B:1000 nM vs. parkin B:100 nM	2.818	0.9472 to 4.688	Yes	***	0.0003
																control B:1000 nM vs. parkin B:1000 nM	2.47	0.5993 to 4.340	Yes	**	0.0023
																parkin A:Untreated vs. parkin A:Vehicle	-0.3995	-2.270 to 1.471	No	ns	>0.9999
																parkin A:Untreated vs. parkin A:100 nM	-2.013	-3.883 to -0.1421	Yes	*	0.0253
																parkin A:Untreated vs. parkin A:1000 nM	-3.089	-4.959 to -1.218	Yes	****	<0.0001
																parkin A:Untreated vs. parkin B:Untreated	-0.4558	-2.326 to 1.415	No	ns	0.9999
																parkin A:Untreated vs. parkin B:Vehicle	-0.05714	-1.928 to 1.813	No	ns	>0.9999
																parkin A:Untreated vs. parkin B:100 nM	-2.157	-4.028 to -0.2868	Yes	*	0.0122
																parkin A:Untreated vs. parkin B:1000 nM	-2.505	-4.376 to -0.6347	Yes	**	0.0019
																parkin A:Vehicle vs. parkin A:100 nM	-1.613	-3.484 to 0.2573	No	ns	0.1531
																parkin A:Vehicle vs. parkin A:1000 nM	-2.689	-4.560 to -0.8186	Yes	***	0.0007
																parkin A:Vehicle vs. parkin B:Untreated	-0.05631	-1.927 to 1.814	No	ns	>0.9999
																parkin A:Vehicle vs. parkin B:Vehicle	0.3423	-1.528 to 2.213	No	ns	>0.9999
																parkin A:Vehicle vs. parkin B:100 nM	-1.758	-3.628 to 0.1126	No	ns	0.0833
																parkin A:Vehicle vs. parkin B:1000 nM	-2.106	-3.976 to -0.2353	Yes	*	0.0159
																parkin A:100 nM vs. parkin A:1000 nM	-1.076	-2.946 to 0.7946	No	ns	0.7324
																parkin A:100 nM vs. parkin B:Untreated	1.557	-0.3137 to 3.427	No	ns	0.1907
																parkin A:100 nM vs. parkin B:Vehicle	1.956	0.08498 to 3.826	Yes	*	0.0334
																parkin A:100 nM vs. parkin B:100 nM	-0.1447	-2.015 to 1.726	No	ns	>0.9999
																parkin A:100 nM vs. parkin B:1000 nM	-0.4926	-2.363 to 1.378	No	ns	0.9997
																parkin A:1000 nM vs. parkin B:Untreated	2.633	0.7623 to 4.503	Yes	***	0.001
																parkin A:1000 nM vs. parkin B:Vehicle	3.031	1.161 to 4.902	Yes	***	0.0001
																parkin A:1000 nM vs. parkin B:100 nM	0.9312	-0.9393 to 2.802	No	ns	0.8808
																parkin A:1000 nM vs. parkin B:1000 nM	0.5833	-1.287 to 2.454	No	ns	0.9979
																parkin B:Untreated vs. parkin B:Vehicle	0.3986	-1.472 to 2.269	No	ns	>0.9999
																parkin B:Untreated vs. parkin B:100 nM	-1.702	-3.572 to 0.1689	No	ns	0.1063
																parkin B:Untreated vs. parkin B:1000 nM	-2.049	-3.920 to -0.1790	Yes	*	0.021
																parkin B:Vehicle vs. parkin B:100 nM	-2.1	-3.971 to -0.2297	Yes	*	0.0163
																parkin B:Vehicle vs. parkin B:1000 nM	-2.448	-4.319 to -0.5776	Yes	**	0.0026
																parkin B:100 nM vs. parkin B:1000 nM	-0.3479	-2.218 to 1.523	No	ns	>0.9999
																Test details	Mean 1	Mean 2	Mean Diff.	SE of diff.	N1	N2	q	DF
																control A:Untreated vs. control A:Vehicle	6.23	5.832	0.3979	0.5044	3	3	1.115	32
																control A:Untreated vs. control A:100 nM	6.23	7.223	-0.9924	0.5044	3	3	2.782	32
																control A:Untreated vs. control A:1000 nM	6.23	7.33	-1.1	0.5044	3	3	3.084	32
																control A:Untreated vs. control B:Untreated	6.23	5.683	0.5473	0.5044	3	3	1.534	32
																control A:Untreated vs. control B:Vehicle	6.23	6.05	0.1799	0.5044	3	3	0.5042	32
																control A:Untreated vs. control B:100 nM	6.23	7.023	-0.793	0.5044	3	3	2.223	32
																control A:Untreated vs. control B:1000 nM	6.23	7.102	-0.872	0.5044	3	3	2.445	32
																control A:Untreated vs. parkin A:Untreated	6.23	2.127	4.103	0.5044	3	3	11.5	32
																control A:Untreated vs. parkin A:Vehicle	6.23	2.527	3.704	0.5044	3	3	10.38	32
																control A:Untreated vs. parkin A:100 nM	6.23	4.14	2.09	0.5044	3	3	5.861	32
																control A:Untreated vs. parkin A:1000 nM	6.23	5.216	1.014	0.5044	3	3	2.844	32
																control A:Untreated vs. parkin B:Untreated	6.23	2.583	3.647	0.5044	3	3	10.23	32
																control A:Untreated vs. parkin B:Vehicle	6.23	2.184	4.046	0.5044	3	3	11.34	32
																control A:Untreated vs. parkin B:100 nM	6.23	4.285	1.946	0.5044	3	3	5.455	32
																control A:Untreated vs. parkin B:1000 nM	6.23	4.633	1.598	0.5044	3	3	4.48	32
																control A:Vehicle vs. control A:100 nM	5.832	7.223	-1.39	0.5044	3	3	3.898	32
																control A:Vehicle vs. control A:1000 nM	5.832	7.33	-1.498	0.5044	3	3	4.2	32
																control A:Vehicle vs. control B:Untreated	5.832	5.683	0.1494	0.5044	3	3	0.4188	32
																control A:Vehicle vs. control B:Vehicle	5.832	6.05	-0.218	0.5044	3	3	0.6112	32
																control A:Vehicle vs. control B:100 nM	5.832	7.023	-1.191	0.5044	3	3	3.339	32
																control A:Vehicle vs. control B:1000 nM	5.832	7.102	-1.27	0.5044	3	3	3.56	32
																control A:Vehicle vs. parkin A:Untreated	5.832	2.127	3.705	0.5044	3	3	10.39	32
																control A:Vehicle vs. parkin A:Vehicle	5.832	2.527	3.306	0.5044	3	3	9.268	32
																control A:Vehicle vs. parkin A:100 nM	5.832	4.14	1.693	0.5044	3	3	4.745	32
																control A:Vehicle vs. parkin A:1000 nM	5.832	5.216	0.6166	0.5044	3	3	1.729	32
																control A:Vehicle vs. parkin B:Untreated	5.832	2.583	3.249	0.5044	3	3	9.11	32
																control A:Vehicle vs. parkin B:Vehicle	5.832	2.184	3.648	0.5044	3	3	10.23	32
																control A:Vehicle vs. parkin B:100 nM	5.832	4.285	1.548	0.5044	3	3	4.339	32
																control A:Vehicle vs. parkin B:1000 nM	5.832	4.633	1.2	0.5044	3	3	3.364	32
																control A:100 nM vs. control A:1000 nM	7.223	7.33	-0.1077	0.5044	3	3	0.3019	32
																control A:100 nM vs. control B:Untreated	7.223	5.683	1.54	0.5044	3	3	4.317	32
																control A:100 nM vs. control B:Vehicle	7.223	6.05	1.172	0.5044	3	3	3.287	32
																control A:100 nM vs. control B:100 nM	7.223	7.023	0.1994	0.5044	3	3	0.5591	32
																control A:100 nM vs. control B:1000 nM	7.223	7.102	0.1204	0.5044	3	3	0.3376	32
																control A:100 nM vs. parkin A:Untreated	7.223	2.127	5.096	0.5044	3	3	14.29	32
																control A:100 nM vs. parkin A:Vehicle	7.223	2.527	4.696	0.5044	3	3	13.17	32
																control A:100 nM vs. parkin A:100 nM	7.223	4.14	3.083	0.5044	3	3	8.643	32
																control A:100 nM vs. parkin A:1000 nM	7.223	5.216	2.007	0.5044	3	3	5.626	32
																control A:100 nM vs. parkin B:Untreated	7.223	2.583	4.64	0.5044	3	3	13.01	32
																control A:100 nM vs. parkin B:Vehicle	7.223	2.184	5.038	0.5044	3	3	14.13	32
																control A:100 nM vs. parkin B:100 nM	7.223	4.285	2.938	0.5044	3	3	8.237	32
																control A:100 nM vs. parkin B:1000 nM	7.223	4.633	2.59	0.5044	3	3	7.262	32
																control A:1000 nM vs. control B:Untreated	7.33	5.683	1.647	0.5044	3	3	4.618	32
																control A:1000 nM vs. control B:Vehicle	7.33	6.05	1.28	0.5044	3	3	3.588	32
																control A:1000 nM vs. control B:100 nM	7.33	7.023	0.3071	0.5044	3	3	0.861	32
																control A:1000 nM vs. control B:1000 nM	7.33	7.102	0.2281	0.5044	3	3	0.6395	32
																control A:1000 nM vs. parkin A:Untreated	7.33	2.127	5.203	0.5044	3	3	14.59	32
																control A:1000 nM vs. parkin A:Vehicle	7.33	2.527	4.804	0.5044	3	3	13.47	32
																control A:1000 nM vs. parkin A:100 nM	7.33	4.14	3.191	0.5044	3	3	8.945	32
																control A:1000 nM vs. parkin A:1000 nM	7.33	5.216	2.115	0.5044	3	3	5.928	32
																control A:1000 nM vs. parkin B:Untreated	7.33	2.583	4.747	0.5044	3	3	13.31	32
																control A:1000 nM vs. parkin B:Vehicle	7.33	2.184	5.146	0.5044	3	3	14.43	32
																control A:1000 nM vs. parkin B:100 nM	7.33	4.285	3.046	0.5044	3	3	8.539	32
																control A:1000 nM vs. parkin B:1000 nM	7.33	4.633	2.698	0.5044	3	3	7.564	32
																control B:Untreated vs. control B:Vehicle	5.683	6.05	-0.3674	0.5044	3	3	1.03	32
																control B:Untreated vs. control B:100 nM	5.683	7.023	-1.34	0.5044	3	3	3.758	32
																control B:Untreated vs. control B:1000 nM	5.683	7.102	-1.419	0.5044	3	3	3.979	32
																control B:Untreated vs. parkin A:Untreated	5.683	2.127	3.556	0.5044	3	3	9.969	32
																control B:Untreated vs. parkin A:Vehicle	5.683	2.527	3.156	0.5044	3	3	8.849	32
																control B:Untreated vs. parkin A:100 nM	5.683	4.14	1.543	0.5044	3	3	4.326	32
																control B:Untreated vs. parkin A:1000 nM	5.683	5.216	0.4672	0.5044	3	3	1.31	32
																control B:Untreated vs. parkin B:Untreated	5.683	2.583	3.1	0.5044	3	3	8.691	32
																control B:Untreated vs. parkin B:Vehicle	5.683	2.184	3.499	0.5044	3	3	9.809	32
																control B:Untreated vs. parkin B:100 nM	5.683	4.285	1.398	0.5044	3	3	3.921	32
																control B:Untreated vs. parkin B:1000 nM	5.683	4.633	1.051	0.5044	3	3	2.945	32
																control B:Vehicle vs. control B:100 nM	6.05	7.023	-0.9729	0.5044	3	3	2.727	32
																control B:Vehicle vs. control B:1000 nM	6.05	7.102	-1.052	0.5044	3	3	2.949	32
																control B:Vehicle vs. parkin A:Untreated	6.05	2.127	3.923	0.5044	3	3	11	32
																control B:Vehicle vs. parkin A:Vehicle	6.05	2.527	3.524	0.5044	3	3	9.879	32
																control B:Vehicle vs. parkin A:100 nM	6.05	4.14	1.911	0.5044	3	3	5.356	32
																control B:Vehicle vs. parkin A:1000 nM	6.05	5.216	0.8346	0.5044	3	3	2.34	32
																control B:Vehicle vs. parkin B:Untreated	6.05	2.583	3.467	0.5044	3	3	9.721	32
																control B:Vehicle vs. parkin B:Vehicle	6.05	2.184	3.866	0.5044	3	3	10.84	32
																control B:Vehicle vs. parkin B:100 nM	6.05	4.285	1.766	0.5044	3	3	4.951	32
																control B:Vehicle vs. parkin B:1000 nM	6.05	4.633	1.418	0.5044	3	3	3.975	32
																control B:100 nM vs. control B:1000 nM	7.023	7.102	-0.079	0.5044	3	3	0.2215	32
																control B:100 nM vs. parkin A:Untreated	7.023	2.127	4.896	0.5044	3	3	13.73	32
																control B:100 nM vs. parkin A:Vehicle	7.023	2.527	4.497	0.5044	3	3	12.61	32
																control B:100 nM vs. parkin A:100 nM	7.023	4.14	2.883	0.5044	3	3	8.084	32
																control B:100 nM vs. parkin A:1000 nM	7.023	5.216	1.808	0.5044	3	3	5.067	32
																control B:100 nM vs. parkin B:Untreated	7.023	2.583	4.44	0.5044	3	3	12.45	32
																control B:100 nM vs. parkin B:Vehicle	7.023	2.184	4.839	0.5044	3	3	13.57	32
																control B:100 nM vs. parkin B:100 nM	7.023	4.285	2.739	0.5044	3	3	7.678	32
																control B:100 nM vs. parkin B:1000 nM	7.023	4.633	2.391	0.5044	3	3	6.703	32
																control B:1000 nM vs. parkin A:Untreated	7.102	2.127	4.975	0.5044	3	3	13.95	32
																control B:1000 nM vs. parkin A:Vehicle	7.102	2.527	4.576	0.5044	3	3	12.83	32
																control B:1000 nM vs. parkin A:100 nM	7.102	4.14	2.962	0.5044	3	3	8.305	32
																control B:1000 nM vs. parkin A:1000 nM	7.102	5.216	1.887	0.5044	3	3	5.289	32
																control B:1000 nM vs. parkin B:Untreated	7.102	2.583	4.519	0.5044	3	3	12.67	32
																control B:1000 nM vs. parkin B:Vehicle	7.102	2.184	4.918	0.5044	3	3	13.79	32
																control B:1000 nM vs. parkin B:100 nM	7.102	4.285	2.818	0.5044	3	3	7.9	32
																control B:1000 nM vs. parkin B:1000 nM	7.102	4.633	2.47	0.5044	3	3	6.924	32
																parkin A:Untreated vs. parkin A:Vehicle	2.127	2.527	-0.3995	0.5044	3	3	1.12	32
																parkin A:Untreated vs. parkin A:100 nM	2.127	4.14	-2.013	0.5044	3	3	5.642	32
																parkin A:Untreated vs. parkin A:1000 nM	2.127	5.216	-3.089	0.5044	3	3	8.659	32
																parkin A:Untreated vs. parkin B:Untreated	2.127	2.583	-0.4558	0.5044	3	3	1.278	32
																parkin A:Untreated vs. parkin B:Vehicle	2.127	2.184	-0.05714	0.5044	3	3	0.1602	32
																parkin A:Untreated vs. parkin B:100 nM	2.127	4.285	-2.157	0.5044	3	3	6.048	32
																parkin A:Untreated vs. parkin B:1000 nM	2.127	4.633	-2.505	0.5044	3	3	7.024	32
																parkin A:Vehicle vs. parkin A:100 nM	2.527	4.14	-1.613	0.5044	3	3	4.523	32
																parkin A:Vehicle vs. parkin A:1000 nM	2.527	5.216	-2.689	0.5044	3	3	7.539	32
																parkin A:Vehicle vs. parkin B:Untreated	2.527	2.583	-0.05631	0.5044	3	3	0.1579	32
																parkin A:Vehicle vs. parkin B:Vehicle	2.527	2.184	0.3423	0.5044	3	3	0.9597	32
																parkin A:Vehicle vs. parkin B:100 nM	2.527	4.285	-1.758	0.5044	3	3	4.928	32
																parkin A:Vehicle vs. parkin B:1000 nM	2.527	4.633	-2.106	0.5044	3	3	5.904	32
																parkin A:100 nM vs. parkin A:1000 nM	4.14	5.216	-1.076	0.5044	3	3	3.016	32
																parkin A:100 nM vs. parkin B:Untreated	4.14	2.583	1.557	0.5044	3	3	4.365	32
																parkin A:100 nM vs. parkin B:Vehicle	4.14	2.184	1.956	0.5044	3	3	5.482	32
																parkin A:100 nM vs. parkin B:100 nM	4.14	4.285	-0.1447	0.5044	3	3	0.4057	32
																parkin A:100 nM vs. parkin B:1000 nM	4.14	4.633	-0.4926	0.5044	3	3	1.381	32
																parkin A:1000 nM vs. parkin B:Untreated	5.216	2.583	2.633	0.5044	3	3	7.381	32
																parkin A:1000 nM vs. parkin B:Vehicle	5.216	2.184	3.031	0.5044	3	3	8.499	32
																parkin A:1000 nM vs. parkin B:100 nM	5.216	4.285	0.9312	0.5044	3	3	2.611	32
																parkin A:1000 nM vs. parkin B:1000 nM	5.216	4.633	0.5833	0.5044	3	3	1.635	32
																parkin B:Untreated vs. parkin B:Vehicle	2.583	2.184	0.3986	0.5044	3	3	1.118	32
																parkin B:Untreated vs. parkin B:100 nM	2.583	4.285	-1.702	0.5044	3	3	4.77	32
																parkin B:Untreated vs. parkin B:1000 nM	2.583	4.633	-2.049	0.5044	3	3	5.746	32
																parkin B:Vehicle vs. parkin B:100 nM	2.184	4.285	-2.1	0.5044	3	3	5.888	32
																parkin B:Vehicle vs. parkin B:1000 nM	2.184	4.633	-2.448	0.5044	3	3	6.863	32
																parkin B:100 nM vs. parkin B:1000 nM	4.285	4.633	-0.3479	0.5044	3	3	0.9753	32

## Sheet: Fig 3E
Figure 3E
																								Tukey's multiple comparisons test	Mean Diff.	95.00% CI of diff.	Significant?	Summary	Adjusted P Value
		Untreated				Vehicle				10 nM				100 nM				1000 nM						control A
	control A	0.015395	0.015495	0.014873	0.0147827	0.013923	0.015497	0.01471	0.01479	0.0134	0.01601	0.01414	0.01442	0.0144	0.0168	0.0145587		0.01847	0.0195	0.0179	0.01918			Untreated vs. Vehicle	0.0004064	-0.001489 to 0.002302	No	ns	0.7847
	parkin A	0.01177	0.011785	0.0111625	0.011932	0.01128	0.0111	0.011	0.0107	0.0138	0.013801	0.01455	0.01382	0.0124	0.0151	0.01381		0.0151	0.0135	0.01441	0.01292			Untreated vs. 10 nM	0.0006439	-0.002119 to 0.003407	No	ns	0.7406
	control B	0.014533	0.012648	0.017625	0.0157262	0.015035	0.01162	0.0171	0.01532	0.0152	0.015045	0.01967	0.01752	0.0156	0.0116	0.01721		0.01731	0.01591	0.02082	0.01749			Untreated vs. 100 nM	-0.0001165	-0.005062 to 0.004829	No	ns	0.9995
	parkin B	0.0090015	0.009	0.014025	0.0121	0.00931	0.00901	0.01382	0.0118	0.0117	0.01262	0.01514	0.012808	0.01057	0.01295	0.015134		0.01399	0.014753	0.0172	0.0139			Untreated vs. 1000 nM	-0.003626	-0.005439 to -0.001814	Yes	**	0.0071
																								Vehicle vs. 10 nM	0.0002375	-0.001109 to 0.001584	No	ns	0.8679
																								Vehicle vs. 100 nM	-0.0005229	-0.003555 to 0.002510	No	ns	0.7113
																								Vehicle vs. 1000 nM	-0.004033	-0.005641 to -0.002424	Yes	**	0.0036
																								10 nM vs. 100 nM	-0.0007604	-0.001990 to 0.0004689	No	ns	0.123
																								10 nM vs. 1000 nM	-0.00427	-0.006295 to -0.002245	Yes	**	0.0061
																								100 nM vs. 1000 nM	-0.00351	-0.006445 to -0.0005746	Yes	*	0.0354
																								Parkin A
																								Untreated vs. Vehicle	0.0006424	-0.0005467 to 0.001831	No	ns	0.2225
																								Untreated vs. 10 nM	-0.00233	-0.004207 to -0.0004535	Yes	*	0.0277
																								Untreated vs. 100 nM	-0.002108	-0.007934 to 0.003719	No	ns	0.3028
																								Untreated vs. 1000 nM	-0.00232	-0.005391 to 0.0007503	No	ns	0.103
																								Vehicle vs. 10 nM	-0.002973	-0.004192 to -0.001754	Yes	**	0.0039
																								Vehicle vs. 100 nM	-0.00275	-0.008788 to 0.003288	No	ns	0.2097
																								Vehicle vs. 1000 nM	-0.002963	-0.005019 to -0.0009062	Yes	*	0.0182
																								10 nM vs. 100 nM	0.0002228	-0.005631 to 0.006077	No	ns	0.997
																								10 nM vs. 1000 nM	1.025e-05	-0.002463 to 0.002484	No	ns	>0.9999
																								100 nM vs. 1000 nM	-0.0002125	-0.009327 to 0.008902	No	ns	0.9996
																								control B
																								Untreated vs. Vehicle	0.0003643	-0.001326 to 0.002055	No	ns	0.782
																								Untreated vs. 10 nM	-0.001726	-0.003709 to 0.0002579	No	ns	0.0721
																								Untreated vs. 100 nM	0.0003297	-0.004292 to 0.004951	No	ns	0.9719
																								Untreated vs. 1000 nM	-0.002749	-0.004583 to -0.0009161	Yes	*	0.0163
																								Vehicle vs. 10 nM	-0.00209	-0.005756 to 0.001576	No	ns	0.1984
																								Vehicle vs. 100 nM	-3.458e-05	-0.001617 to 0.001548	No	ns	0.9997
																								Vehicle vs. 1000 nM	-0.003114	-0.005914 to -0.0003130	Yes	*	0.0375
																								10 nM vs. 100 nM	0.002055	-0.006319 to 0.01043	No	ns	0.5092
																								10 nM vs. 1000 nM	-0.001024	-0.003362 to 0.001314	No	ns	0.3347
																								100 nM vs. 1000 nM	-0.003079	-0.008709 to 0.002551	No	ns	0.1532
																								Parkin B
																								Untreated vs. Vehicle	4.662e-05	-0.0006693 to 0.0007626	No	ns	0.9953
																								Untreated vs. 10 nM	-0.002035	-0.005646 to 0.001575	No	ns	0.2033
																								Untreated vs. 100 nM	-0.001853	-0.008444 to 0.004738	No	ns	0.4315
																								Untreated vs. 1000 nM	-0.003929	-0.008661 to 0.0008031	No	ns	0.0813
																								Vehicle vs. 10 nM	-0.002082	-0.005207 to 0.001043	No	ns	0.1395
																								Vehicle vs. 100 nM	-0.0019	-0.008414 to 0.004614	No	ns	0.4114
																								Vehicle vs. 1000 nM	-0.003976	-0.008167 to 0.0002157	No	ns	0.0575
																								10 nM vs. 100 nM	0.0001823	-0.003025 to 0.003390	No	ns	0.9871
																								10 nM vs. 1000 nM	-0.001894	-0.003334 to -0.0004535	Yes	*	0.0236
																								100 nM vs. 1000 nM	-0.002076	-0.006106 to 0.001953	No	ns	0.17
																								Test details	Mean 1	Mean 2	Mean Diff.	SE of diff.	N1	N2	q	DF
																								control A
																								Untreated vs. Vehicle	0.01514	0.01473	0.0004064	0.0003574	4	4	1.608	3
																								Untreated vs. 10 nM	0.01514	0.01449	0.0006439	0.0005209	4	4	1.748	3
																								Untreated vs. 100 nM	0.01514	0.01525	-0.0001165	0.0006428	4	3	0.2562	2
																								Untreated vs. 1000 nM	0.01514	0.01876	-0.003626	0.0003417	4	4	15.01	3
																								Vehicle vs. 10 nM	0.01473	0.01449	0.0002375	0.0002538	4	4	1.323	3
																								Vehicle vs. 100 nM	0.01473	0.01525	-0.0005229	0.0003941	4	3	1.876	2
																								Vehicle vs. 1000 nM	0.01473	0.01876	-0.004033	0.0003032	4	4	18.81	3
																								10 nM vs. 100 nM	0.01449	0.01525	-0.0007604	0.0001598	4	3	6.731	2
																								10 nM vs. 1000 nM	0.01449	0.01876	-0.00427	0.0003817	4	4	15.82	3
																								100 nM vs. 1000 nM	0.01525	0.01876	-0.00351	0.0003815	3	4	13.01	2
																								Parkin A
																								Untreated vs. Vehicle	0.01166	0.01102	0.0006424	0.0002242	4	4	4.053	3
																								Untreated vs. 10 nM	0.01166	0.01399	-0.00233	0.0003538	4	4	9.314	3
																								Untreated vs. 100 nM	0.01166	0.01377	-0.002108	0.0007573	4	3	3.936	2
																								Untreated vs. 1000 nM	0.01166	0.01398	-0.00232	0.0005788	4	4	5.669	3
																								Vehicle vs. 10 nM	0.01102	0.01399	-0.002973	0.0002298	4	4	18.29	3
																								Vehicle vs. 100 nM	0.01102	0.01377	-0.00275	0.0007848	4	3	4.956	2
																								Vehicle vs. 1000 nM	0.01102	0.01398	-0.002963	0.0003877	4	4	10.81	3
																								10 nM vs. 100 nM	0.01399	0.01377	0.0002228	0.0007608	4	3	0.4141	2
																								10 nM vs. 1000 nM	0.01399	0.01398	1.025e-05	0.0004663	4	4	0.03108	3
																								100 nM vs. 1000 nM	0.01377	0.01398	-0.0002125	0.001185	3	4	0.2537	2
																								control B
																								Untreated vs. Vehicle	0.01513	0.01477	0.0003643	0.0003187	4	4	1.617	3
																								Untreated vs. 10 nM	0.01513	0.01686	-0.001726	0.000374	4	4	6.526	3
																								Untreated vs. 100 nM	0.01513	0.0148	0.0003297	0.0006007	4	3	0.7763	2
																								Untreated vs. 1000 nM	0.01513	0.01788	-0.002749	0.0003456	4	4	11.25	3
																								Vehicle vs. 10 nM	0.01477	0.01686	-0.00209	0.000691	4	4	4.277	3
																								Vehicle vs. 100 nM	0.01477	0.0148	-3.458e-05	0.0002057	4	3	0.2378	2
																								Vehicle vs. 1000 nM	0.01477	0.01788	-0.003114	0.000528	4	4	8.34	3
																								10 nM vs. 100 nM	0.01686	0.0148	0.002055	0.001088	4	3	2.671	2
																								10 nM vs. 1000 nM	0.01686	0.01788	-0.001024	0.0004408	4	4	3.285	3
																								100 nM vs. 1000 nM	0.0148	0.01788	-0.003079	0.0007317	3	4	5.951	2
																								Parkin B
																								Untreated vs. Vehicle	0.01103	0.01099	4.662e-05	0.000135	4	4	0.4885	3
																								Untreated vs. 10 nM	0.01103	0.01307	-0.002035	0.0006807	4	4	4.229	3
																								Untreated vs. 100 nM	0.01103	0.01288	-0.001853	0.0008566	4	3	3.059	2
																								Untreated vs. 1000 nM	0.01103	0.01496	-0.003929	0.0008921	4	4	6.229	3
																								Vehicle vs. 10 nM	0.01099	0.01307	-0.002082	0.0005891	4	4	4.999	3
																								Vehicle vs. 100 nM	0.01099	0.01288	-0.0019	0.0008466	4	3	3.173	2
																								Vehicle vs. 1000 nM	0.01099	0.01496	-0.003976	0.0007902	4	4	7.116	3
																								10 nM vs. 100 nM	0.01307	0.01288	0.0001823	0.0004169	4	3	0.6186	2
																								10 nM vs. 1000 nM	0.01307	0.01496	-0.001894	0.0002715	4	4	9.864	3
																								100 nM vs. 1000 nM	0.01288	0.01496	-0.002076	0.0005237	3	4	5.606	2
